# Supplementary material for: A Regime Shift in Seasonal Total Antarctic Sea Ice Extent in the 20th Century
Source: Research Square preprint supplement (doi:10.21203/rs.3.rs-828060/v1), 2021-08-24
Supplement: Supplementary file 1 [file 89a01a131f030c7268c313c0.docx]

**Supplementary Information: A Regime Shift in Seasonal Total Antarctic Sea Ice Extent in the 20th Century**

Ryan L. Fogt1, Amanda M. Sleinkofer1, Marilyn N. Raphael2, Mark S. Handcock3

1Department of Geography and Scalia Laboratory for Atmospheric Analysis, Ohio University, Athens, OH

2Department of Geography, University of California – Los Angeles, Los Angeles, CA

3Department of Statistics, University of California – Los Angeles, Los Angeles, CA


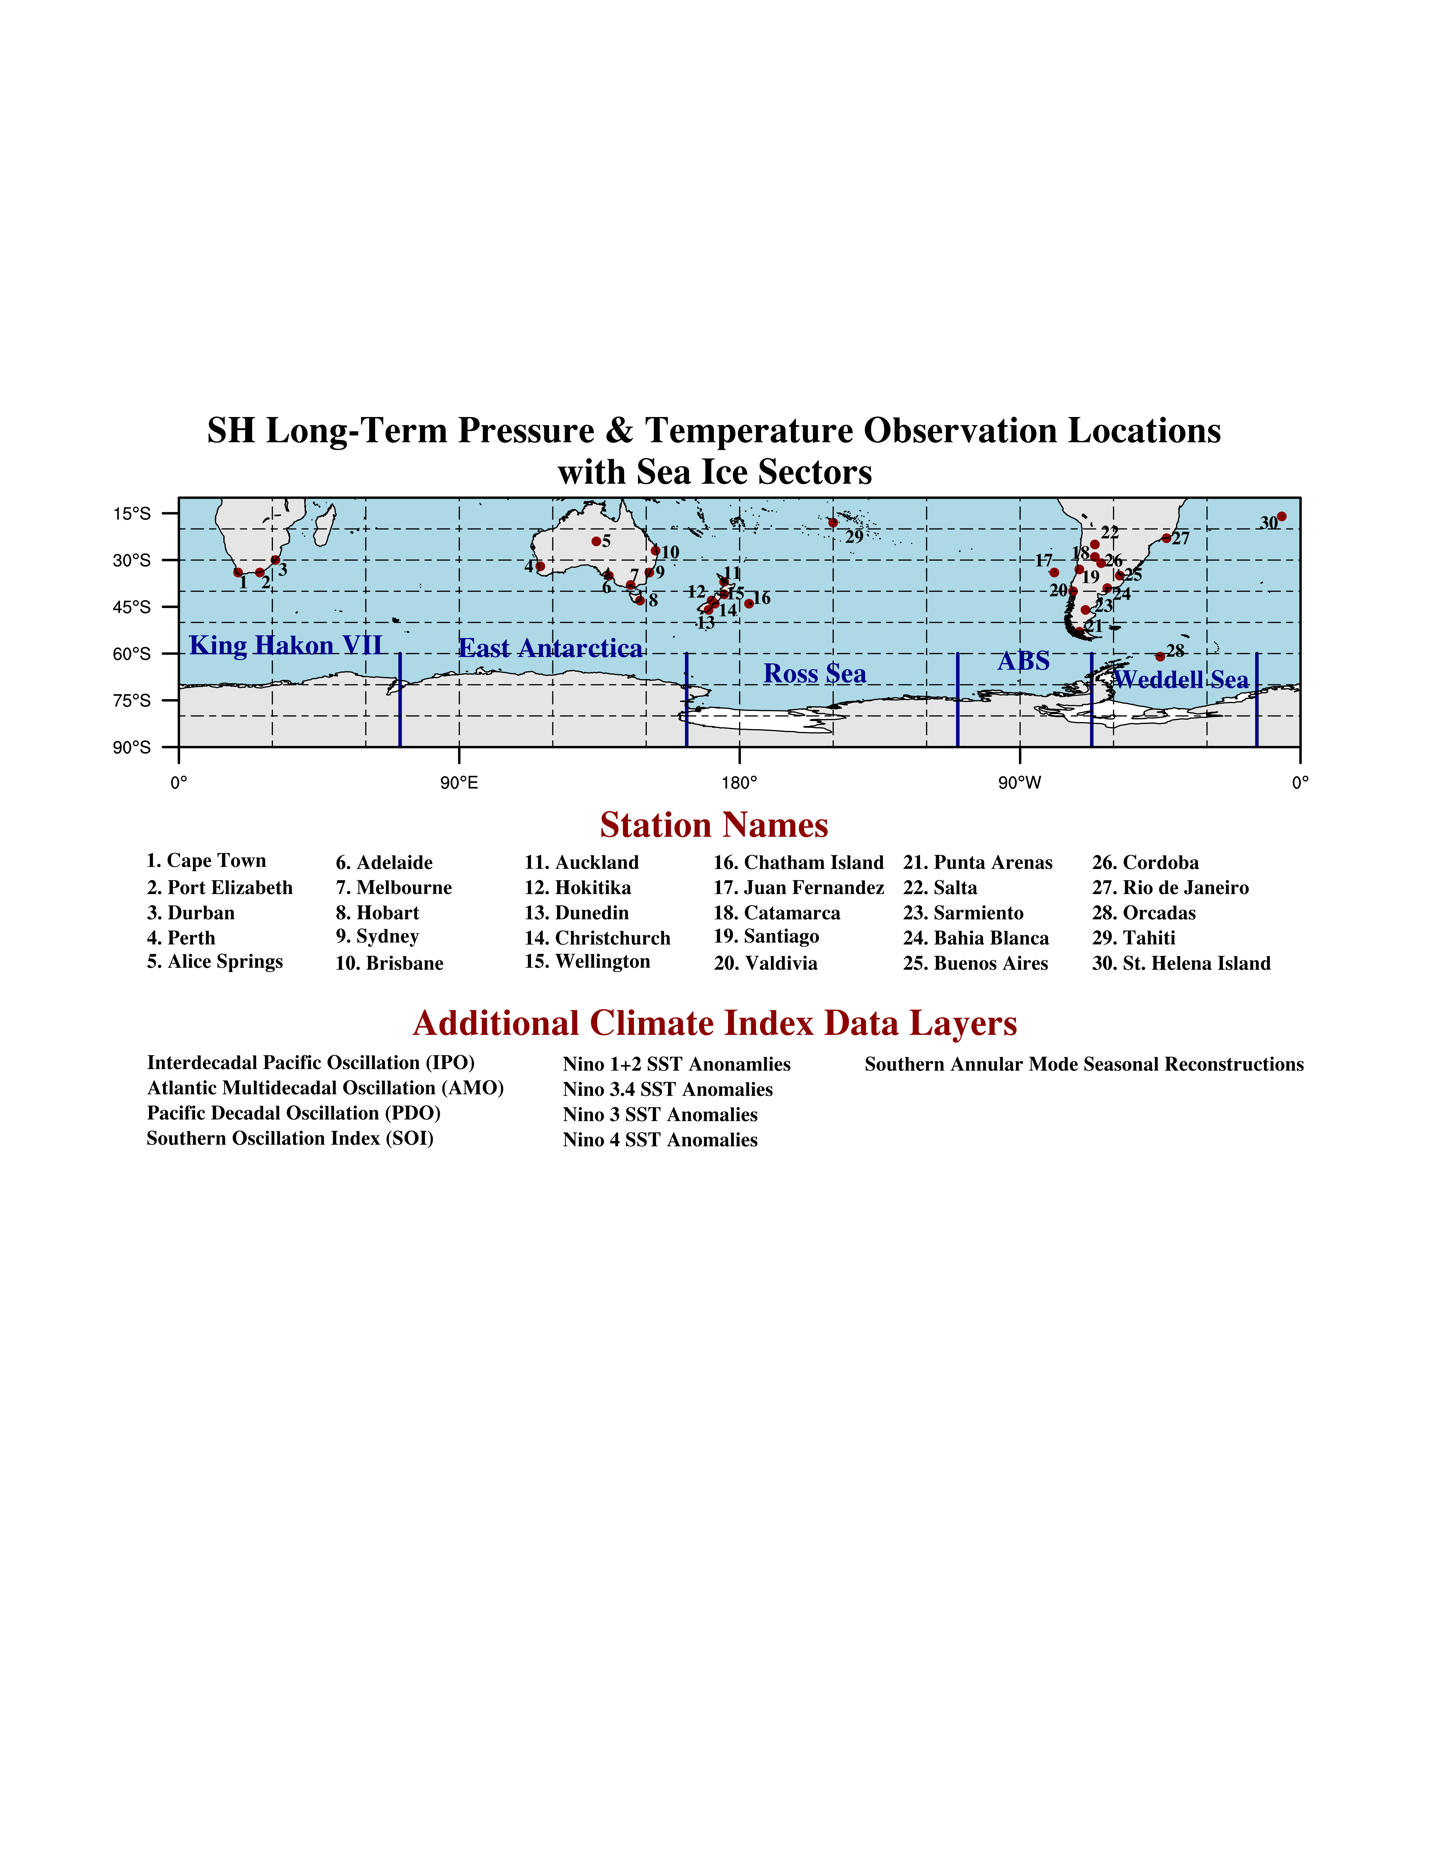


**Figure S1**. Map of predictor stations and sea ice sectors defined in Raphael and Hobbs (2014)1.

**References**

1. Raphael, M. N. & Hobbs, W. The influence of the large-scale atmospheric circulation on Antarctic sea ice during ice advance and retreat seasons. *Geophys. Res. Lett.* **41**, 5037–5045 (2014).
